# Supplementary material
Source: publisher figshare collection journal article supplement (https://geolsoc.figshare.com/ndownloader/files/5424086)
Supplement: Supplementary file 1 [file 5424086]

Table 2. Taimyr granite 207Pb/206Pb analytical results (Kober method)
			error		error	error		error			error	207/206	ratio err	Age from	Age err
Grain.step		208/206	(1? abs)	207/206	(1? abs)	(1? %)	204/206	(1? abs)	Th/U*	f204	f204	cor ratio	1? %	corr 7/6	2? abs
VP98-002a (Foliated granite) N lat. 75° 11.85', E Long. 092° 27.32'
1.1	0.1	0.087064	0.091693	0.052395	0.000202	0.38515	0.000008	0.000016	0.302221633	0.000150778	0.000301556	0.052277436	0.59193	298	14
1.2	0.1	0.089550	0.127586	0.052429	0.000195	0.37155	0.000020	0.000010	0.310536784	0.000369619	0.000189887	0.052141089	0.46903	292	11
2.1	0.1	0.088182	0.000352	0.052152	0.000570	1.09297	0.000006	0.000017	0.305795765	0.000102802	0.000308668	0.052071527	1.18794	289	27
2.2	0.1	0.089256	0.080049	0.052984	0.000362	0.68285	0.000005	0.000012	0.309519281	0.000093	0.000218146	0.052911531	0.75519	325	17
2.3	0.1	0.086297	0.043166	0.052628	0.000268	0.50923	0.000039	0.000019	0.299257031	0.000716463	0.000355404	0.052070842	0.74001	289	17
2.4	0.1	0.086736	0.048637	0.052734	0.000271	0.51296	0.000013	0.000025	0.300779259	0.000241898	0.000473928	0.052545435	0.87010	309	20
2.5	0.1	0.085221	0.028422	0.052502	0.000308	0.58722	0.000018	0.000040	0.295525667	0.000338739	0.000750784	0.052238442	1.26448	296	29
2.6	0.1	0.085483	0.029221	0.052449	0.000270	0.51460	0.000011	0.000011	0.296435041	0.000195332	0.00019726	0.05229669	0.59375	298	14
2.7	0.1	0.085531	0.046664	0.052592	0.000264	0.50255	0.000015	0.000051	0.29659989	0.000272904	0.000943968	0.052379785	1.48988	302	34
3.1	0.1	0.085521	0.096268	0.052791	0.000439	0.83102	0.000017	0.000010	0.296565522	0.000314162	0.000188132	0.052546554	0.88033	309	20
3.2	0.1	0.076282	0.065208	0.052816	0.000278	0.52673	0.000028	0.000052	0.264527078	0.000527794	0.000971502	0.05240579	1.53696	303	35
3.3	0.1	0.089486	0.130264	0.052714	0.000386	0.73301	0.000029	0.000015	0.310317416	0.000547947	0.000278347	0.052287655	0.84752	298	19
4.1	0.1	0.076154	0.281329	0.052789	0.000759	1.43724	0.000017	0.000012	0.264083126	0.000314811	0.000225387	0.052543748	1.48242	309	34
4.2	0.1	0.072364	0.059739	0.052622	0.000147	0.27973	0.000013	0.000016	0.250941701	0.00024036	0.000297993	0.052435005	0.52365	304	12
4.3	0.1	0.073473	0.090786	0.051970	0.000382	0.73427	0.000018	0.000041	0.254787707	0.000326724	0.000763713	0.051715716	1.36625	273	31
4.4	0.1	0.071246	0.213547	0.052624	0.000234	0.44466	0.000014	0.000010	0.247062744	0.000254408	0.000194782	0.052426479	0.53181	304	12
4.5	0.1	0.073518	0.064296	0.052611	0.000245	0.46644	0.000006	0.000017	0.254943796	0.000104199	0.000309422	0.052530089	0.65426	309	15
4.6	0.1	0.072530	0.041708	0.052758	0.000328	0.62094	0.000005	0.000003	0.251517428	9.83435E-05	0.0000465	0.052681956	0.62568	315	14
4.7	0.1	0.074161	0.074143	0.052522	0.000377	0.71742	0.000005	0.000025	0.25717197	0.000093	0.000465	0.052449588	0.99574	305	23
4.8	0.1	0.076170	0.081651	0.052805	0.000306	0.58005	0.000007	0.000007	0.264140646	0.000132857	0.000132857	0.05270213	0.61342	316	14
4.9	0.1	0.076321	0.039890	0.052596	0.000316	0.60081	0.000014	0.000029	0.264662865	0.000267637	0.000543605	0.052387582	1.00771	302	23
5.1	0.1	0.079493	0.068810	0.052755	0.000130	0.24661	0.000010	0.000027	0.275664281	0.000193403	0.000506288	0.052605049	0.78816	312	18
5.2	0.1	0.083051	0.024024	0.052682	0.000151	0.28605	0.000023	0.000020	0.288002156	0.000422677	0.000365422	0.052353707	0.61465	301	14
6.1	0.1	0.085602	0.054198	0.052578	0.000329	0.62555	0.000014	0.000027	0.296847641	0.000253479	0.000511003	0.05238099	0.98500	302	22
6.2	0.1	0.074355	0.018877	0.052660	0.000139	0.26339	0.000016	0.000039	0.257846958	0.000292145	0.000717178	0.052432437	1.09629	304	25
6.3	0.1	0.079223	0.060220	0.052337	0.000430	0.82103	0.000015	0.000041	0.274727069	0.000283277	0.000763124	0.052116643	1.40652	291	32
6.4	0.1	0.083298	0.070889	0.052619	0.000285	0.54201	0.000006	0.000007	0.288857514	0.000118026	0.000124	0.052526738	0.57321	308	13
6.5	0.1	0.082379	0.048238	0.052497	0.000175	0.33278	0.000010	0.000023	0.285672194	0.000186717	0.000422295	0.0523522	0.71066	301	16
6.6	0.1	0.081438	0.056804	0.052582	0.000159	0.30181	0.000006	0.000017	0.282409232	0.00011076	0.00031	0.052496184	0.54978	307	13
6.7	0.1	0.082731	0.082103	0.052664	0.000233	0.44167	0.000010	0.000020	0.286891725	0.000184381	0.000365422	0.052520848	0.69924	308	16
6.8	0.1	0.083074	0.064648	0.052671	0.000282	0.53597	0.000022	0.000010	0.288080394	0.000412115	0.000188844	0.052350319	0.60810	301	14
6.9	0.1	0.081356	0.051007	0.052630	0.000296	0.56318	0.000005	0.000005	0.282121897	0.000093	0.000093	0.052557498	0.58054	310	13
6.1	0.1	0.083389	0.048130	0.052572	0.000285	0.54192	0.000010	0.000017	0.289172397	0.000190279	0.000315372	0.052424443	0.71718	304	16
6.11	0.1	0.086837	0.066635	0.052800	0.000216	0.40909	0.000012	0.000016	0.301129116	0.000217427	0.000302705	0.052631179	0.60703	313	14
6.12	0.1	0.087486	0.045555	0.052590	0.000257	0.48869	0.000015	0.000011	0.303381964	0.000272759	0.000212486	0.052377896	0.58349	302	13
6.13	0.1	0.088760	0.031120	0.052585	0.000203	0.38680	0.000013	0.000031	0.307800102	0.000241813	0.000582251	0.052396966	0.94752	303	22
	Note: The final Th/U modeled ratio is a molecular porportion of 232Th/238U and not an initial ratio.
Kober evaporation method.
Zircons were separated from about 2 kg of sample using conventional magnetic and heavy liquid mineral separation techniques. Methods for sample preparation and analysis follow Kober (1986, 1987). Analyses were made at the Laboratory of Isotope Geology, Swedish Museum of Nartural History, Stockholm, using a Finnigan MAT261 mass spectrometer. Zircons were hand-picked under a binocular microscope an…
Data was collected in peak-jumping mode using a secondary electron multiplier with each scan encompassing the sequence 206-207-208-206-204Pb. One to eight blocks of 10 scans each were registered for each heating step. All scans were used to produce the mean ratios and associated standard errors for each step. No correction for mass fractionation was applied. Correction to the 207Pb/206Pb for comm…
Kober references.
Kober, B., 1986. Whole gran evaporatin for 207Pb/206Pb-age investigations on single zircons using a double-filament thermal ion source.
	Contributions to Mineralogy and Petrology, 93, 482-490.
Kober, B., 1987. Single zircon evaporation combined with Pb+ emitter bedding for 207Pb/206Pb-age investigations using thermal ion mass spectrometry and implication to
	zirconology. Contributions to Mineralogy and Petrology, 96, 63-71.
Ludwig, K., 2004. Isoplot/ Ex ver. 3.2: A geochronological toolkit for Microsoft Excel. Berkeley Geochronology Center Special Publications.
Stacey, J. & Kramers, J., 1975. Approximation of terrestrial lead isotope evolution by a two-stage model: Earth and Planetary Science Letters 26, 207-221.
